# Supplementary material for: Predictive factors for sleep apnoea in patients on opioids for chronic pain
Source: PubMed Central journal article supplement — BMJ Open Respir Res. 2019 Dec 23;6(1):e000523. doi: 10.1136/bmjresp-2019-000523 (PMC6936992; doi:10.1136/bmjresp-2019-000523), 2019-12-23
Supplement: bmjresp-2019-000523supp001.pdf [file bmjresp-2019-000523supp001.pdf]

## Supplementary Appendix

**SUPPLEMENTARY APPENDIX**

This supplementary appendix has been provided by the authors to give readers more information about their work.

1. Trial Organization: pp 2
2. Inclusion and Exclusion Criteria: pp 3
3. Measures in Study: pp 4-6
  - a) STOP-Bang questionnaire
  - b) Epworth Sleepiness Scale
  - c) Friedman Staging, Mallampati Classification and Thyromental Distance
  - d) Polysomnography
  - e) Oximetry
  - f) Patient Opioids Education Measure (POEM) (Not reported in main manuscript due to limitation on the number of words. Methods and results of POEM reported here in e-supplements)
4. Additional Results: pp 7
5. Supplementary e tables: pp 8-12
  - e-Table 1. Number of Patients Using Opioid Medications and Doses.
  - e-Table 2. Demographic Data of Subjects Grouped by Polysomnography Completion.
  - e-Table 3. Demographic Data of Participants Grouped by Severity of Sleep Apnoea
  - e-Table 4. The percentage of patients with CAI  $\geq 5$  in the different types of opioids.
  - e-Table 5. Internal validation of models.
6. References: pp 13

## Supplementary Appendix

**Trial Organization**

**Steering Committee:** Frances Chung (Chair), Jean Wong, Geoff Bellingham, Gerald Lebovic, Clodagh Ryan.

**Polysomnography Committee:** Clodagh Ryan, Charles George.

**Protocol Development:** Jean Wong, Mandeep Singh, Peter Liao, Clodagh Ryan, Frances Chung.

**Statisticians:** Gerald Lebovic, Rida Waseem.

**Investigators:** (number of patients enrolled in each site are in parentheses).

Toronto Western Hospital Pain Clinic (44) - Frances Chung.

Toronto Rehabilitation Institute Pain Clinic (61) - Frances Chung, Andrea Furlan.

Women College Hospital Pain Clinic (54) - Jean Wong, Anuj Bhatia.

Mount Sinai Hospital Wasser Pain Clinic (89) - Frances Chung, Philip Peng.

St. Joseph's Health Care Pain Clinic (84) - Geoff Bellingham.

**Pain Team at each pain clinic:**

Toronto Western Hospital - Anuj Bhatia, Philip Peng, Neilesh Soneji, Paul Tumber.

Mount Sinai Hospital - Hance Clarke, David Evans, Allan Gordon, Philip Peng, Paul Tumber, Neilesh Soneji.

Toronto Rehabilitation Institute - John Flannery, Andrea D Furlan, Dinesh Kumbhare.

Women College Hospital - Arsenio Avila, Anuj Bhatia, David Flamer, Michael Gofeld, Anwar Morgan.

St. Joseph's Hospital - Physicians: Collin Clarke, Eldon Loh, Tom Miller, Katherine Ower, Qutaiba Tawfic, James Watson. Psychologists; Heather Getty, Marilyn Hill. Nurses: Cathy Lowery, Cathy Rohfritsch.

**Research Staff:** Emad Al Azazi, Asmita Bhoite, Rabia Jomezai, Halema Khan, Fatiha Mim, Sazzadul Islam.

## Supplementary Appendix

**Inclusion and Exclusion Criteria****Inclusion criteria:**

- (1) Age  $\geq$  18 years.
- (2) Using opioids for  $>3$  months for chronic, non-cancer pain with a stable daily dose for at least 4 weeks.

**Exclusion criteria:**

- (1) Patients with chronic pain secondary to a neoplasm or metastasis as goals of care are different in this patient population.
- (2) Patients requiring urgent sleep physician referral (within four weeks) due to serious medical conditions or safety critical-occupations according to the 2011 Canadian Thoracic Society (CTS) guidelines (e.g. unstable ischaemic heart disease, recent cerebrovascular disease, congestive heart failure, refractory systemic hypertension, pulmonary hypertension, hypercapnic respiratory failure or pregnancy).<sup>1</sup>
- (3) Conditions potentially interfering with comprehension and delivery of informed consent or the educational intervention, such as neurological or psychiatric disorders.
- (4) Patients with a prior diagnosis of sleep-related breathing disorder within the last 3 years with treatment. Patients who may have had sleep studies 3 or more years earlier may be included, if they have been lost to follow-up by a sleep physician, are not on treatment or are non-compliant to treatment (mean CPAP nightly use  $<4$  hours, or median nightly CPAP use  $<50\%$  of total sleep time).

## Supplementary Appendix

**Measures in Study**

The eligible participants underwent different measures including the STOP-Bang questionnaire, the Epworth Sleepiness Scale, Mallampati score, Friedman staging, and thyromental distance. This was followed by an in-laboratory overnight polysomnogram and oximeter at home. This section describes some of the measures.

**a) STOP-Bang Questionnaire <sup>2</sup>****Snoring?**

Do you **Snore Loudly** (loud enough to be heard through closed doors or your bed-partner elbows you for snoring at night)?

**Tired?**

Do you often feel **Tired, Fatigued, or Sleepy** during the daytime (such as falling asleep during driving)?

**Observed?**

Has anyone **Observed** you **Stop Breathing** or **Choking/Gasping** during your sleep?

**Pressure?**

Do you have or are being treated for **High Blood Pressure**?

**Body Mass Index more than 35 kg/m<sup>2</sup>?****Age older than 50 year old?****Neck size large? (Measured around Adams apple)**

For male, is your shirt collar 17 inches or larger?

For female, is your shirt collar 16 inches or larger?

**Gender = Male?****Scoring Criteria:**

**Low risk of OSA:** Yes to 0-2 questions

**High risk of OSA:** Yes to 3-4 questions

**Very high risk of OSA:** Yes to 5-8 questions

Proprietary to University Health Network

## Supplementary Appendix

**b) Epworth Sleepiness Scale <sup>3</sup>**

Name: \_\_\_\_\_ Today's date: \_\_\_\_\_

Your age (Yrs.): \_\_\_\_\_ Your sex (Male = M, Female = F): \_\_\_\_\_

How likely are you to doze off or fall asleep in the following situations, in contrast to feeling just tired?

This refers to your usual way of life in recent times.

Even if you haven't done some of these things recently try to work out how they would have affected you.

Use the following scale to choose the **most appropriate number** for each situation:

- 0 = would **never** doze
- 1 = **slight chance** of dozing
- 2 = **moderate chance** of dozing
- 3 = **high chance** of dozing

*It is important that you answer each question as best you can.***Situation****Chance of Dozing (0-3)**

Sitting and reading \_\_\_\_\_

Watching TV \_\_\_\_\_

Sitting, inactive in a public place (e.g. a theater or a meeting) \_\_\_\_\_

As a passenger in a car for an hour without a break \_\_\_\_\_

Lying down to rest in the afternoon when circumstance permit \_\_\_\_\_

Sitting and talking to someone \_\_\_\_\_

Sitting quietly after a lunch without alcohol \_\_\_\_\_

In a car, while stopped for a few minutes in the traffic \_\_\_\_\_

|       |
|-------|
| _____ |
| _____ |
| _____ |
| _____ |
| _____ |
| _____ |
| _____ |
| _____ |

© M.W. Johns 1990-97

## Supplementary Appendix

**c) Friedman Staging, Mallampati score and Thyromental Distance**

All three measures, Friedman staging, Mallampati score, and thyromental distance (distance from the thyroid notch to tip of jaw) predict ease of intubation.<sup>4</sup> A Pearson correlation showed that there was a moderate association between Friedman and Mallampati classification,  $r = 0.5$ ,  $P < 0.0001$ . Therefore, in the study, only Mallampati classification was presented and used in the models.

**d) Polysomnography**

In-laboratory polysomnography was used to determine sleep-disordered breathing. Apnoea was defined as  $\geq 90\%$  drop in air flow from baseline for  $\geq 10$  sec. Apnoeas were further classified as obstructive, central or mixed in nature. The apnoea was defined as obstructive or central due to the presence or absence of respiratory effort, respectively. A mixed apnoea was scored if there was absent inspiratory effort in the initial portion of the event, followed by resumption of inspiratory effort in the second portion of the event. Hypopnoea was defined as  $\geq 30\%$  reduction in airflow for  $\geq 10$  seconds and a  $\geq 3\%$  decrease in the  $SpO_2$  or associated with an arousal. Hypopnoeas were not further classified in this study due to the difficulty in accurately differentiating central from obstructive. Sleep related hypoxemia was defined as greater than 30% of total sleep time at a  $SpO_2$  of less than 90%.<sup>5</sup>

Patients were classified as having obstructive sleep apnoea if the obstructive apnoea-hypopnoea index and mixed index was  $\geq 5$  events per hour and  $\geq 50\%$  were scored as obstructive in origin. Patients were classified as having central sleep apnoea when the central apnoea index were  $\geq 5$  events per hour and  $> 50\%$  were scored as central in origin. Sleep apnoea was deemed indeterminate when the total apnoea-hypopnoea index was  $\geq 5$  events per hour and the obstructive or central apnoea-hypopnoea indices were  $< 5$  events per hour.

**e) Oximetry**

The wristwatch pulse oximeter (PULSOX-300, Konica Minolta) was worn by patients during the same night as they underwent polysomnography. The oximetry data was extracted from the overnight recording with a commercially available software program and the oximetry data will be analysed in a subsequent manuscript.

**f) Patient Opioid Education Measure (POEM)**

Patients were assessed on their opioid-related knowledge via the Patient Opioid Education Measure (POEM) at the first visit.<sup>6</sup> They were educated on opioids via an education sheet, relevant pamphlet and video from Institute for Safe Medication Practices (ISMP) Canada. The Patient Opioid Education Measure was repeated around 6-8 weeks during subsequent pain clinic visit. If patients were not scheduled for pain clinic visit within 6-8 weeks' period by the pain physician, the study personnel called the patients to collect answers on the POEM questionnaire and treatment therapy.

## Supplementary Appendix

**Additional Results****Patient Opioid Education Measure (POEM)**

To measure the patient's opioid-related knowledge, POEM was completed at three different times, pre-training, post-training, and at a follow-up visit. In the unadjusted model, the mean score at the pre-training period was 65.16; 95% CI 63.82- 66.49. At post-training it decreased significantly by an average of 4.50 (2.81- 6.18) and at the follow-up visit, it did not increase significantly by 1.86 (-0.18,3.90), compared to pre-training (baseline). Adjustment of age, gender and BMI in the model did not change the results in any meaningful way (analysis not shown). We were unable to demonstrate any improvement in knowledge on opioids via an education sheet, relevant pamphlet and video from Institute for Safe Medication Practices (ISMP) Canada.

## Supplementary Appendix

## Supplementary Tables

| <b>e-Table 1 Number of Patients Using Opioid Medications and Doses.*</b> |               |                         |                                                               |
|--------------------------------------------------------------------------|---------------|-------------------------|---------------------------------------------------------------|
| <b>Opioid Medication<sup>7</sup></b>                                     | <b>Number</b> | <b>Dose<sup>a</sup></b> | <b>Morphine Milligram<br/>Equivalents per day<sup>a</sup></b> |
| <b>Morphine<sup>b</sup></b>                                              | 34            | 91.6 (5-950)            | 91.6 (5-950)                                                  |
| <b>Hydromorphone<sup>c</sup></b>                                         | 41            | 23.8 (0.3-124)          | 120.6 (1.5-620)                                               |
| <b>Oxycodone<sup>d</sup></b>                                             | 82            | 46.4 (5-260)            | 69.0 (7.5-390)                                                |
| <b>Tramadol<sup>e</sup></b>                                              | 33            | 194.7 (37-550)          | 22.9 (3.7-60)                                                 |
| <b>Codeine<sup>f</sup></b>                                               | 25            | 141.6 (30-600)          | 18.7 (4.5-60)                                                 |
| <b>Methadone</b>                                                         | 14            | 34.4 (4-140)            | 318.3 (16-1680)                                               |
| <b>Buprenorphine<sup>g</sup></b>                                         | 9             | 9.5 (5-20)              | 112.2 (20-200)                                                |
| <b>Fentanyl<sup>h</sup></b>                                              | 21            | 61.9 (12.5-200)         | 552.6 (90-1440)                                               |
| <b>Meperidine</b>                                                        | 1             | 30.0 (30)               | 3.0 (3)                                                       |
| <b>Tapentadol</b>                                                        | 5             | 220.0 (100-400)         | 88.0 (40-160)                                                 |

\*Daily opioids doses were converted to approximate MME using the approach set forth by the US Centers for Disease Control and Prevention.<sup>7</sup>

<sup>a</sup> Doses are presented as mean (range) per day in milligram

<sup>b</sup> Morphine and Hydrocodone

<sup>c</sup> Hydromorphone, Dilaudid, Hydromorph Contin

<sup>d</sup> Oxycodone, Oxycontin, Oxycocet, Percocet

<sup>e</sup> Tramadol, Tramacet

<sup>f</sup> Codeine, Tylenol # 1, Tylenol # 2, Tylenol # 3, Tylenol # 4

<sup>g</sup> Buprenorphine: patch, tablet

<sup>h</sup> Fentanyl: patch



## Supplementary Appendix

| <b>e-Table 2. Demographic Data of Subjects Grouped by Polysomnography Completion.</b> |                                          |                                   |
|---------------------------------------------------------------------------------------|------------------------------------------|-----------------------------------|
| <b>Variables*</b>                                                                     | <b>Participants did not complete PSG</b> | <b>Participants completed PSG</b> |
| <b>N=332</b>                                                                          | 128                                      | 204                               |
| <b>Body mass index, mean (SD), kg/m<sup>2</sup></b>                                   | 29.3±7.5                                 | 28.6±6.3                          |
| <b>Age, mean (SD), year</b>                                                           | 52.4±13.1                                | 52±13.1                           |
| <b>Neck circumference, mean (SD), cm</b>                                              | 38.2±4.8                                 | 38.8±5                            |
| <b>Male, no. (%)</b>                                                                  | 46(35.9)                                 | 84(41.2)                          |
| <b>STOP-Bang score, mean (SD)</b>                                                     | 3.4±1.6                                  | 3.6±1.7                           |
| <b>Epworth Sleepiness Scale, mean (SD), score</b>                                     | 7±5.4                                    | 8.5±5.4 <sup>†</sup>              |
| <b>Daytime SpO<sub>2</sub>, mean (SD), %</b>                                          | 95.5±1.7                                 | 95.1±2.3                          |
| <b>Thyromental distance, mean (SD), cm</b>                                            | 8.3±1.9                                  | 8.6±1.9                           |
| <b>Morphine Milligram Equivalents per day (MME) median (IQR), mg/24h</b>              | 53.3(20-162.5)                           | 70(30-165)                        |
| <b>Medical History, no. (%)</b>                                                       |                                          |                                   |
| <b>Active smoker</b>                                                                  | 31(24.2)                                 | 47(23)                            |
| <b>Asthma/COPD</b>                                                                    | 17(13.2)                                 | 27(13.2)                          |

PSG = Polysomnography; IQR = interquartile range; Daytime SpO<sub>2</sub> = oxyhaemoglobin saturation; COPD = chronic obstructive pulmonary disease.

\*Plus-minus values are means ± SD. Numbers and percentages are for categorical variables. T-test or Wilcoxon rank-sum test and chi-square analysis were conducted to examine differences in the characteristic for participants who completed PSG and did not.

<sup>†</sup>P <0.05.

## Supplementary Appendix

| <b>e-Table 3. Demographic Data of Patients Grouped by Severity of Sleep Apnoea.</b> |     |                       |                         |                                 |                                      |                               |
|-------------------------------------------------------------------------------------|-----|-----------------------|-------------------------|---------------------------------|--------------------------------------|-------------------------------|
| CHARACTERISTICS*                                                                    | N   | Sleep Apnoea Severity |                         |                                 |                                      |                               |
|                                                                                     |     | All patients          | No Sleep Apnoea (AHI<5) | Mild Sleep Apnoea (AHI 5 - <15) | Moderate Sleep Apnoea (AHI 15 - <30) | Severe Sleep Apnoea (AHI ≥30) |
| No of patients                                                                      | 204 | 204                   | 84                      | 55                              | 28                                   | 37                            |
| Body Mass Index, mean (SD), kg/m <sup>2</sup>                                       | 204 | 28.6±6.4              | 27.3±6.2                | 28.6±4.9                        | 29.8±7.5                             | 30.5±7.3 <sup>†</sup>         |
| Age, mean (SD), year                                                                | 204 | 52±13.1               | 46.9±13.4               | 55.1±10.7                       | 54.3±14.1                            | 57.4±10.9 <sup>†</sup>        |
| Neck circumference, mean (SD), cm                                                   | 202 | 38.8±5                | 37.5±4.9                | 38.5±4.4                        | 40.7±5.6                             | 40.7±4.7 <sup>†</sup>         |
| Male, no. (%)                                                                       | 204 | 84(41.2)              | 26(31)                  | 22(40)                          | 14(50)                               | 22(59.5) <sup>†</sup>         |
| STOP-Bang score, mean (SD)                                                          | 202 | 3.6±1.7               | 2.9±1.6                 | 3.4±1.4                         | 4.5±1.8                              | 4.5±1.3 <sup>†</sup>          |
| Epworth Sleepiness Scale score, mean (SD)                                           | 201 | 8.5±5.4               | 7.5±5.3                 | 8.3±5.4                         | 8.3±5.4                              | 10.9±4.8 <sup>†</sup>         |
| Daytime SpO <sub>2</sub> , mean (SD), %                                             | 194 | 95.1±2.3              | 95.9±1.9                | 95.2±1.8                        | 94.1±2.5                             | 93.9±2.8 <sup>†</sup>         |
| Morphine Milligram equivalents per day (MME), median (IQR), mg/24h                  | 203 | 70 (30-165)           | 60 (24.5-120)           | 60 (22.5-180)                   | 80 (30-180)                          | 95 (30-193)                   |
| Thyroental distance, mean (SD), cm                                                  | 202 | 8.6±1.9               | 8.7±1.8                 | 8.4±1.9                         | 8.4±1.8                              | 9±2                           |
| Mallampati score, no <3 & ≥3                                                        | 204 | 99 & 105              | 47 & 37                 | 27 & 28                         | 11 & 17                              | 14 & 23                       |
| <b>SLEEP PARAMETERS</b>                                                             |     |                       |                         |                                 |                                      |                               |
| Apnoea-hypopnoea index, median (IQR), events/hour                                   | 204 | 6.4 (2.3-19.1)        | 1.5 (0.8-3)             | 8 (5.9-11.4)                    | 19.1 (17.3-24.9)                     | 49.8 (39.8-70.8) <sup>†</sup> |
| Obstructive apnoea index, median (IQR), events/hour                                 | 204 | 4.6 (1.5-13.5)        | 1.3(0.5-2.5)            | 5.6 (4.6-9.4)                   | 16.3 (12.8-19.6)                     | 32.7 (20.4-43.2) <sup>†</sup> |
| Central apnoea index, median (IQR), events/hour                                     | 204 | 0.4(0-1.9)            | 0.05(0-0.45)            | 0.8(0.2-1.8)                    | 2.3(0.2-6.3)                         | 4.5(0.4-38.3) <sup>†</sup>    |
| Mixed apnoea index, median (IQR), events/hour                                       | 204 | 0(0-0)                | 0.0(0-0)                | 0(0-0)                          | 0(0-0)                               | 0.2(0-1.5) <sup>†</sup>       |
| Hypopnoea index, median (IQR), events/hour                                          | 203 | 4.09 (1.3-10.6)       | 1.3 (0.5-2.5)           | 5.6 (4.2-8.6)                   | 13.4 (6.4-18)                        | 21.3 (8.8-35.5) <sup>†</sup>  |
| Mean SpO <sub>2</sub> , mean (SD), %                                                | 204 | 94.2±4.9              | 95±2.1                  | 93.9±2.4                        | 93.7±1.9                             | 93.3±2.1 <sup>†</sup>         |
| Min SpO <sub>2</sub> , mean (SD), %                                                 | 204 | 86.2±6.4              | 90.1±3.5                | 86.5±4.6                        | 81.8±7.5                             | 80.5±6.5 <sup>†</sup>         |
| CT 90, median (IQR), %                                                              | 203 | 0.2 (0-4.7)           | 0 (0-0.1)               | 0.3 (0-3.7)                     | 1.9 (0.7-7.7)                        | 4.8 (1.1-16.3) <sup>†</sup>   |
| Oxygen Desaturation, median (IQR), Index (≥3%)                                      | 196 | 9.1 (2.5-26.4)        | 1.8 (1-4)               | 9.5 (5.8-14.4)                  | 22.5 (15.2-34.6)                     | 49.1 (33.9-69.4) <sup>†</sup> |

IQR = interquartile range; AHI = apnoea-hypopnoea index; Daytime SpO<sub>2</sub> = oxyhaemoglobin saturation; CT90 = Cumulative time SpO<sub>2</sub> <90%;

\* Plus-minus values are means ± SD. Numbers and percentages are for categorical variables. One-way analysis of variance or Kruskal-Wallis test and chi-square analysis were conducted, as appropriate to examine differences in the characteristics for severity of sleep apnoea.

<sup>†</sup> P <0.05.

<sup>‡</sup> P <0.001.

## Supplementary Appendix

**e-Table 4. The percentage of patients with CAI  $\geq 5$  in the different types of opioids.**

|                       | CAI <5     | CAI $\geq 5$         |
|-----------------------|------------|----------------------|
| Opioids               | n (%)      | n (%)                |
| <b>N</b>              | <b>171</b> | <b>32</b>            |
| <b>Morphine</b>       | 27(15.8)   | 7(21.9)              |
| <b>Hydromorphone</b>  | 35(20.5)   | 6(18.8)              |
| <b>Oxycodone</b>      | 65(38)     | 16(50)               |
| <b>Tramadol</b>       | 32(18.7)   | 1(3.1) <sup>†</sup>  |
| <b>Codeine</b>        | 23(13.4)   | 2(6.3)               |
| <b>Methadone</b>      | 10(5.8)    | 4(12.5)              |
| <b>Buprenorphine</b>  | 9(5.3)     | 0(0)                 |
| <b>Fentanyl Patch</b> | 14(8.2)    | 7(21.9) <sup>†</sup> |

CAI = central apnoea index.

<sup>†</sup>P<0.05.

## Supplementary Appendix

**e-Table 5. Internal validation of models.**

| Model                           | Statistic | Original | Corrected | Optimism |
|---------------------------------|-----------|----------|-----------|----------|
| <b>AHI <math>\geq</math> 15</b> | Somers D  | 0.5724   | 0.5155    | 0.0569   |
|                                 | Brier's   | 0.1694   | 0.1847    | -0.0153  |
| <b>AHI <math>\geq</math> 5</b>  | Somers D  | 0.5007   | 0.4366    | 0.0641   |
|                                 | Brier's   | 0.1981   | 0.2133    | -0.0153  |
| <b>CAI <math>\geq</math> 5</b>  | Somers D  | 0.5936   | 0.5637    | 0.0298   |
|                                 | Brier's   | 0.1049   | 0.1129    | -0.0081  |
| <b>Central Sleep</b>            | Somers D  | 0.6946   | 0.6885    | 0.0061   |
| <b>Apnoea</b>                   | Brier's   | 0.0703   | 0.0753    | -0.0050  |

AHI = apnoea-hypopnoea index; CAI = central apnoea index.

## Supplementary Appendix

## References

1. Fleetham J, Ayas N, Bradley D, et al. Canadian Thoracic Society 2011 guideline update: diagnosis and treatment of sleep disordered breathing. *Can Respir J*. 2011; 18:25–47.
2. Chung F, Subramanyam R, Liao P, et al. High STOP-Bang score indicates a high probability of obstructive sleep apnoea. *Br J Anaesth*. 2012; 108:768-75.
3. Johns MW. A new method for measuring daytime sleepiness. the Epworth sleepiness scale. *Sleep* 1991; 14: 540-
4. Butler PJ, Dhara SS. Prediction of difficult laryngoscopy: an assessment of the thyromental distance and Mallampati predictive tests. *Anaesth Intensive Care*. 1992; 20:139-42.
5. Berry RB, Brooks R, Gamaldo C, et al. *The AASM Manual for the Scoring of Sleep and Associated Events: Rules, Terminology and Technical Specifications*. Version 2.0. Darien, IL: American Academy of Sleep Medicine, 2012.
6. Wallace LS, Wexler RK, Miser WF, McDougle L, Haddox JD. Development and validation of the Patient Opioid Education Measure. *J Pain Res*. 2013; 6: 663-81.
7. Dowell D, Haegerich TM, Chou R. CDC Guideline for Prescribing Opioids for Chronic Pain - United States, 2016. *MMWR Recomm Rep*. 2016;65(1):1-49.
